# Supplementary material for: Orientation control of lyotropic chromonic liquid crystals in the capillary bridge
Source: Royal Society of Chemistry journal article supplement (doi:10.1039/d2tc00754a), 2022-01-01
Supplement: d2tc00754a4.pdf [file d2tc00754a4.pdf]

## Electronic Supplementary Information

# Orientation Control of Lyotropic Chromonic Liquid Crystals in the Capillary Bridge

Hee Seong Yun,<sup>a</sup> Geonhyeong Park<sup>a</sup> and Dong Ki Yoon<sup>\*ab</sup>

*a Department of Chemistry, Korea Advanced Institute of Science and Technology (KAIST), Daejeon, 34141, Republic of Korea*

*b Graduate School of Nanoscience and Technology and KAIST Institute for Nanocentury, Korea Advanced Institute of Science and Technology (KAIST), Daejeon, 34141, Republic of Korea*

### Legends

**Fig. S1** Synthetic route of PTCDA to PDI-HCl

**Fig. S2** Schematic illustrations of the formation of the capillary bridges in the sandwich cell

**Fig. S3** POM images of uniaxially aligned PDI-HCl in the sandwich cell with diamond-scratched silicon and glass

**Movie S1.** Phase transition to N phase of PDI-HCl in the capillary bridge at  $w = 20 \mu\text{m}$

**Movie S2.** Phase transition to N phase of PDI-HCl in the capillary bridge at  $w = 50 \mu\text{m}$

**Movie S3.** Phase transition to N phase of PDI-HCl in the capillary bridge at  $w = 100 \mu\text{m}$

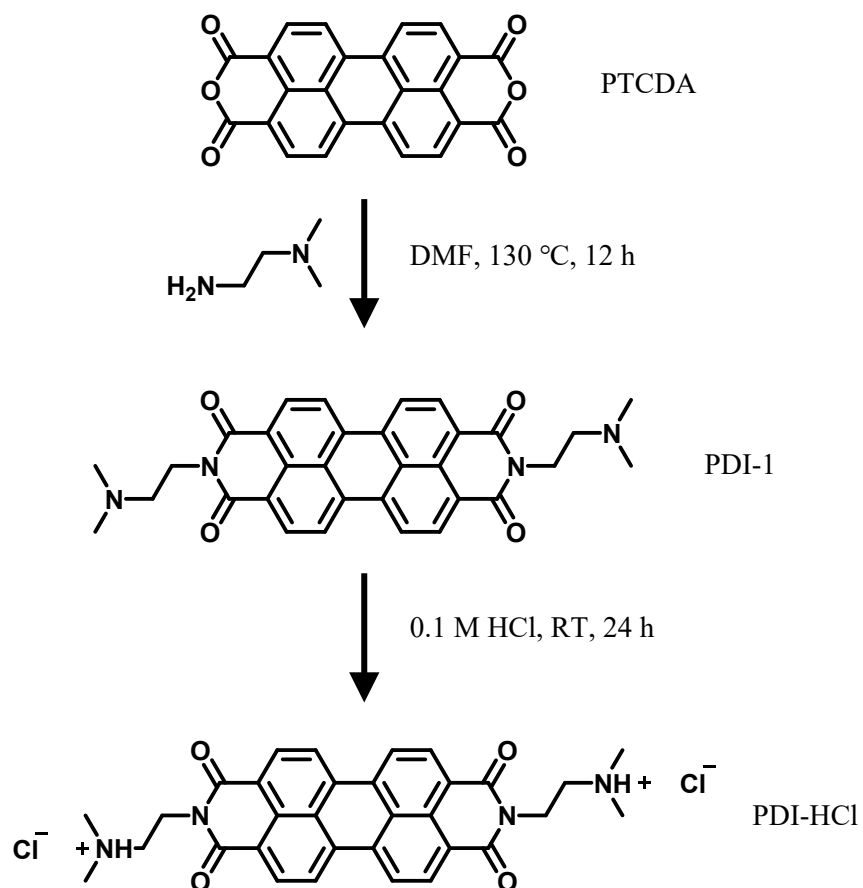

**Fig. S1** Synthetic route of PTCDA to PDI-HCl

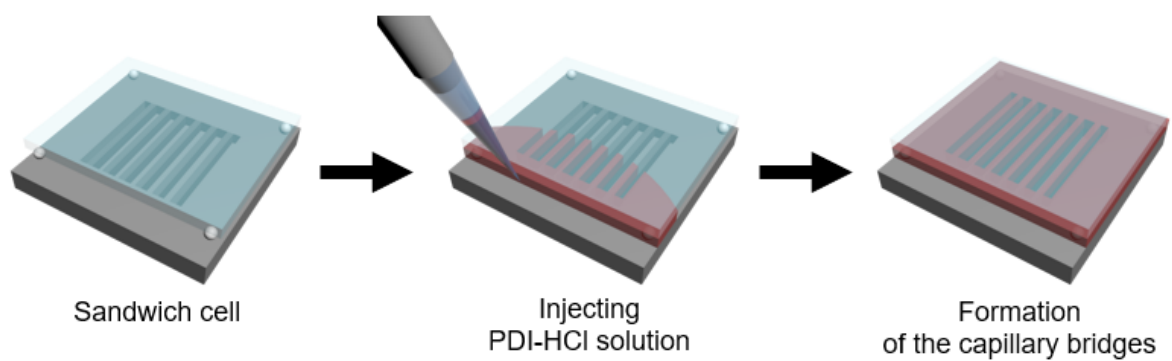

**Figure S2.** Schematic illustrations of the formation of the capillary bridges in the sandwich cell

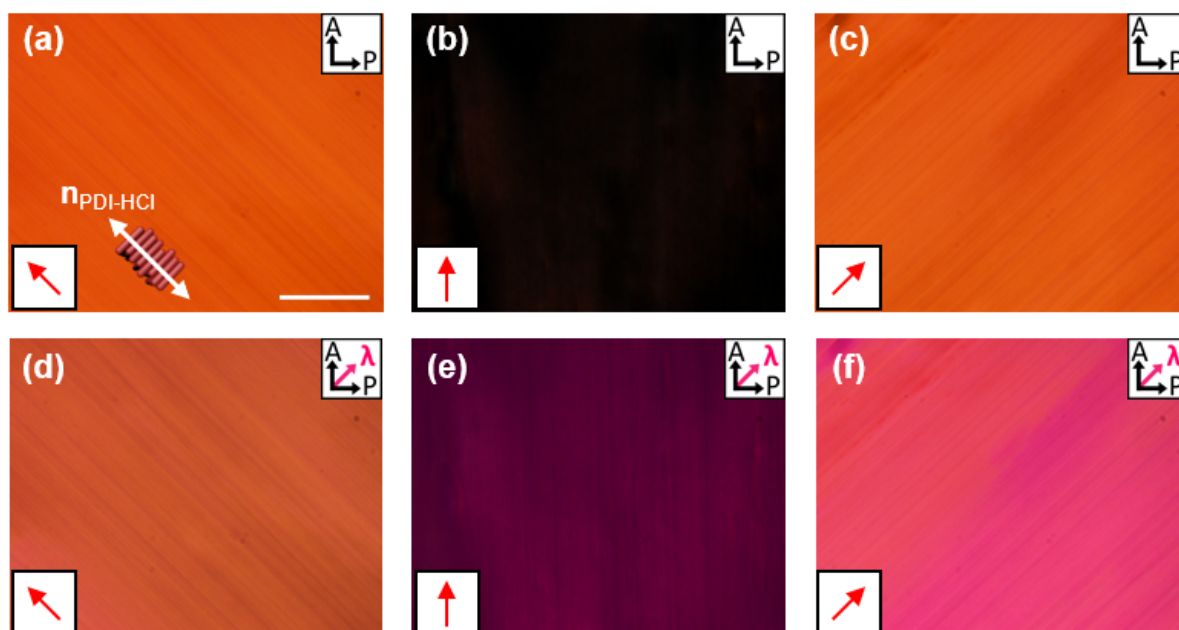

**Figure S3.** (a,b,c) POM and (d,e,f) POM with  $\lambda$  plate images of uniaxially aligned PDI-HCl in the sandwich cell with diamond-scratched silicon and glass. Red arrow means scratch direction and PDI-HCl aggregates aligned parallel to scratch direction.<sup>19</sup> Scale bar is 100  $\mu\text{m}$ .
